# Supplementary material
Source: PubMed Central journal article supplement (PMC3370577)
Supplement: supp_80.6.2150_IAI-IAI00141-12-s01.pdf [file supp_80.6.2150_IAI-IAI00141-12-s01.pdf]

Supplementary File 1. Worm counts, input sequences and assembly characteristics, and microbial biodiversity in the colon microbiota of pigs in response to *Trichuris suis* infection. The numbers denote Mean  $\pm$  SD.

|                      | Control               | Infected              |
|----------------------|-----------------------|-----------------------|
| Worms                | 0 $\pm$ 0.0           | 3222 $\pm$ 1347.5     |
| Input sequences      |                       |                       |
| 16s V3-V5            | 38,304 $\pm$ 6,349.6  | 40,639 $\pm$ 10,212.3 |
| WGS                  | 770,336 $\pm$ 220,096 | 651,913 $\pm$ 68,967  |
| Host sequences       | 0.31% $\pm$ 0.12%     | 2.75% $\pm$ 1.81%     |
| Assembly             |                       |                       |
| N50                  | 637 $\pm$ 37.2        | 530 $\pm$ 75.3        |
| Contig#              | 72813 $\pm$ 10428.7   | 71870 $\pm$ 17950.5   |
| Assembled length, Mb | 43.5 $\pm$ 6.8        | 38.9 $\pm$ 14.5       |
| ORF predicted        |                       |                       |
| Total                | 238,253 $\pm$ 78,072  | 242,862 $\pm$ 51,270  |
| Length (amino acids) | 130 $\pm$ 11.1        | 132 $\pm$ 3.5         |
