# Supplementary material
Source: PubMed Central journal article supplement (PMC3370577)
Supplement: supp_80.6.2150_IAI-IAI00141-12-s03.pdf [file supp_80.6.2150_IAI-IAI00141-12-s03.pdf]

Supplementary File 4. The effect of *Trichuris suis* infection in pigs on the functional profile of the colon microbiota. P value and FDR (false discovery rate) were calculated using MetaStats. The number (Mean  $\pm$  SEM) denotes the percentage of open reading frames (ORF) assigned to a COG functional class/category.

| Class | COG Description                                               | P     | FDR   | Control          | Infected         |
|-------|---------------------------------------------------------------|-------|-------|------------------|------------------|
| A     | RNA processing and modification                               | 0.023 | 0.085 | 0.01 $\pm$ 0.00  | 0.01 $\pm$ 0.00  |
| B     | Chromatin structure and dynamics                              | 0.090 | 0.102 | 0.01 $\pm$ 0.00  | 0.02 $\pm$ 0.01  |
| C     | Energy production and conversion                              | 0.754 | 0.426 | 5.58 $\pm$ 0.08  | 5.61 $\pm$ 0.05  |
| D     | Cell cycle control, cell division, chromosome partitioning    | 0.133 | 0.127 | 1.35 $\pm$ 0.01  | 1.38 $\pm$ 0.01  |
| E     | Amino acid transport and metabolism                           | 0.060 | 0.093 | 9.57 $\pm$ 0.12  | 9.17 $\pm$ 0.06  |
| F     | Nucleotide transport and metabolism                           | 0.635 | 0.419 | 3.98 $\pm$ 0.07  | 3.94 $\pm$ 0.05  |
| G     | Carbohydrate transport and metabolism                         | 0.036 | 0.085 | 8.54 $\pm$ 0.13  | 8.02 $\pm$ 0.05  |
| H     | Coenzyme transport and metabolism                             | 0.643 | 0.419 | 4.32 $\pm$ 0.05  | 4.29 $\pm$ 0.04  |
| I     | Lipid transport and metabolism                                | 0.094 | 0.102 | 2.74 $\pm$ 0.03  | 2.67 $\pm$ 0.02  |
| J     | Translation, ribosomal structure and biogenesis               | 0.627 | 0.419 | 8.69 $\pm$ 0.22  | 8.55 $\pm$ 0.15  |
| K     | Transcription                                                 | 0.068 | 0.093 | 5.61 $\pm$ 0.08  | 5.81 $\pm$ 0.03  |
| L     | Replication, recombination and repair                         | 0.048 | 0.085 | 8.57 $\pm$ 0.02  | 8.75 $\pm$ 0.05  |
| M     | Cell wall/membrane/envelope biogenesis                        | 0.031 | 0.085 | 7.78 $\pm$ 0.00  | 7.48 $\pm$ 0.07  |
| N     | Cell motility                                                 | 0.935 | 0.464 | 0.89 $\pm$ 0.14  | 0.89 $\pm$ 0.04  |
| O     | Posttranslational modification, protein turnover, chaperones  | 0.805 | 0.435 | 3.84 $\pm$ 0.02  | 3.83 $\pm$ 0.02  |
| P     | Inorganic ion transport and metabolism                        | 0.044 | 0.085 | 3.98 $\pm$ 0.03  | 4.17 $\pm$ 0.05  |
| Q     | Secondary metabolites biosynthesis, transport and catabolism  | 0.674 | 0.419 | 0.90 $\pm$ 0.00  | 0.90 $\pm$ 0.02  |
| R     | General function prediction only                              | 0.019 | 0.085 | 10.62 $\pm$ 0.08 | 11.10 $\pm$ 0.08 |
| S     | Function unknown                                              | 0.178 | 0.150 | 4.86 $\pm$ 0.12  | 5.09 $\pm$ 0.08  |
| T     | Signal transduction mechanisms                                | 0.904 | 0.464 | 3.65 $\pm$ 0.16  | 3.66 $\pm$ 0.03  |
| U     | Intracellular trafficking, secretion, and vesicular transport | 0.738 | 0.426 | 1.92 $\pm$ 0.07  | 1.95 $\pm$ 0.05  |
| V     | Defense mechanisms                                            | 0.186 | 0.150 | 2.59 $\pm$ 0.05  | 2.69 $\pm$ 0.04  |
| W     | Extracellular structures                                      | 0.007 | 0.085 | 0.00 $\pm$ 0.00  | 0.00 $\pm$ 0.00  |
| Y     | Nuclear structure                                             | 0.194 | 0.150 | 0.00 $\pm$ 0.00  | 0.00 $\pm$ 0.00  |
| Z     | Cytoskeleton                                                  | 0.099 | 0.102 | 0.01 $\pm$ 0.00  | 0.03 $\pm$ 0.01  |
